# Supplementary material for: Characterisation of the immune compounds in koala milk using a combined transcriptomic and proteomic approach
Source: PubMed Central journal article supplement (PMC5054531; doi:10.1038/srep35011), 2016-10-07
Supplement: srep35011-s1.pdf [file srep35011-s1.pdf]

## Supplementary Information

Characterisation of the immune compounds in koala milk using a combined transcriptomic and proteomic approach.

Katrina M Morris, Denis O'Meally, Thiri Zaw, Xiaomin Song, Amber Gillett, Mark P. Molloy, Adam Polkinghorne, Katherine Belov

Table S1: Top 200 most highly expressed transcripts in the early lactation mammary gland transcriptome

| Early Lactation Mammary Transcriptome                 | % total transcript expression |
|-------------------------------------------------------|-------------------------------|
| B lactoglobulin                                       | 8.195                         |
| Clusterin                                             | 3.903                         |
| Alpha Casein                                          | 3.157                         |
| KORV                                                  | 3.129                         |
| Keratin                                               | 2.025                         |
| Trichosurin                                           | 2.023                         |
| Ferritin heavy chain                                  | 1.554                         |
| Early Lactation Protein                               | 1.054                         |
| Beta Casein                                           | 0.972                         |
| Actin, cytoplasmic type 5                             | 0.961                         |
| Thymosin B-4                                          | 0.677                         |
| Alpha lactalbumin                                     | 0.646                         |
| Polyubiquitin-B                                       | 0.631                         |
| Kappa casein                                          | 0.615                         |
| Butyrophilin subfamily 1 member A1                    | 0.601                         |
| 60S acidic ribosomal protein P1                       | 0.473                         |
| Actin, aortic smooth muscle                           | 0.437                         |
| Nuclease EXOG, mitochondria                           | 0.437                         |
| Zinc-alpha 2 glycoprotein                             | 0.428                         |
| Actin, cytoplasmic 1                                  | 0.406                         |
| Insulin like growth factor                            | 0.384                         |
| Very early lactation protein                          | 0.363                         |
| Marsupial Milk 1                                      | 0.358                         |
| Actin, ACTM                                           | 0.357                         |
| Whey acidic protein                                   | 0.345                         |
| Cytochrome c                                          | 0.319                         |
| Transgelin                                            | 0.314                         |
| Matrix gla protein                                    | 0.279                         |
| 40S ribosomal protein S18                             | 0.279                         |
| Secreted Protein, Acidic, Cysteine-Rich (Osteonectin) | 0.278                         |
| TCDD-inducible poly(ADP-ribose) polymerase            | 0.263                         |
| Chain 5, 60s Rrna                                     | 0.250                         |
| 60S ribosomal protein L6                              | 0.237                         |
| Elongation factor-1                                   | 0.235                         |
| Myosin light Polypeptide                              | 0.234                         |
| Insulin-like growth factor-binding protein 5          | 0.232                         |
| Collagen alpha-1(I) chain-like                        | 0.224                         |
| Prostaglandin-H2                                      | 0.219                         |
| Putative ncRNA                                        | 0.203                         |
| Keratin                                               | 0.200                         |
| 60S ribosomal protein L10a                            | 0.198                         |
| MHC class I                                           | 0.197                         |
| 40S ribosomal protein S24                             | 0.196                         |
| Annexin A2                                            | 0.187                         |

|                                                                     |       |
|---------------------------------------------------------------------|-------|
| E3 ubiquitin                                                        | 0.187 |
| Ribonuclease H1                                                     | 0.185 |
| 60S ribosomal protein L10                                           | 0.184 |
| Cysteine and glycine-rich protein 1                                 | 0.184 |
| Prothymosin alpha                                                   | 0.175 |
| Vimentin                                                            | 0.170 |
| Interleukin-1 receptor-associated kinase 3                          | 0.166 |
| Polyadenylate-binding protein 1                                     | 0.165 |
| Tubulin alpha-1B chain                                              | 0.164 |
| 40S ribosomal protein S6                                            | 0.164 |
| 40S ribosomal protein SA                                            | 0.160 |
| 60S ribosomal protein L4                                            | 0.160 |
| 60S ribosomal protein L13                                           | 0.158 |
| 60S ribosomal protein L39                                           | 0.158 |
| Pancreatic progenitor cell differentiation and proliferation factor | 0.157 |
| Destrin                                                             | 0.156 |
| Tropomyosin alpha-4 chain                                           | 0.154 |
| 40S ribosomal protein S19                                           | 0.151 |
| Elongation factor 2                                                 | 0.151 |
| 40S ribosomal protein S3                                            | 0.150 |
| 60S ribosomal protein L23                                           | 0.147 |
| 60S ribosomal protein L21                                           | 0.145 |
| Ferritin light chain                                                | 0.142 |
| 60S ribosomal protein L30                                           | 0.139 |
| Collagen alpha-1(III) chain                                         | 0.132 |
| 40S ribosomal protein S15                                           | 0.132 |
| Abhydrolase domain-containing protein 2                             | 0.131 |
| 60S ribosomal protein L28                                           | 0.131 |
| Transmembrane 4 L6 family member 1                                  | 0.127 |
| 60S ribosomal protein L23a                                          | 0.127 |
| 40S ribosomal protein S7                                            | 0.126 |
| 40S ribosomal protein S4                                            | 0.124 |
| Putative 60S ribosomal protein L37a                                 | 0.123 |
| Putative ncRNA                                                      | 0.121 |
| Histone-lysine N-methyltransferase 2C                               | 0.121 |
| 60S ribosomal protein L3                                            | 0.120 |
| Wingless-type MMTV integration site family, member 7A-like          | 0.120 |
| 40S ribosomal protein S8                                            | 0.119 |
| Annexin A1                                                          | 0.116 |
| Translationally-controlled tumor protein homolog                    | 0.115 |
| 40S ribosomal protein S2                                            | 0.113 |
| Fatty acid-binding protein, adipocyte                               | 0.113 |
| 40S ribosomal protein S3a                                           | 0.110 |
| Elongation factor 1-gamma                                           | 0.109 |
| 60S ribosomal protein L7a                                           | 0.109 |
| Elastin-like                                                        | 0.109 |
| 40S ribosomal protein S12                                           | 0.107 |
| Mucin 1                                                             | 0.105 |
| Protein NLRC3                                                       | 0.103 |

|                                                           |       |
|-----------------------------------------------------------|-------|
| Integral membrane protein 2B                              | 0.102 |
| 60S ribosomal protein L19                                 | 0.102 |
| Keratin, type I cytoskeletal 18                           | 0.101 |
| Alpha-enolase                                             | 0.101 |
| CD74                                                      | 0.101 |
| 40S ribosomal protein S21                                 | 0.100 |
| Ubiquitin-60S ribosomal protein L40                       | 0.099 |
| Tropomyosin beta chain                                    | 0.099 |
| 60S ribosomal protein L14                                 | 0.098 |
| Gamma-aminobutyric acid receptor-associated protein       | 0.098 |
| Endothelin-converting enzyme 1                            | 0.098 |
| Store-operated calcium entry-associated regulatory factor | 0.097 |
| Beta-2-microglobulin                                      | 0.096 |
| CD63 antigen                                              | 0.096 |
| Fructose-bisphosphate aldolase A                          | 0.094 |
| 40S ribosomal protein S20                                 | 0.094 |
| 60S ribosomal protein L17                                 | 0.093 |
| 60S ribosomal protein L34                                 | 0.092 |
| UTP--glucose-1-phosphate uridylyltransferase              | 0.091 |
| Amyloid beta A4 protein                                   | 0.091 |
| Polymeric immunoglobulin receptor                         | 0.090 |
| Low-density lipoprotein receptor-related protein 10       | 0.090 |
| 60S ribosomal protein L8                                  | 0.090 |
| Ubiquitin-60S ribosomal protein L40                       | 0.090 |
| 40S ribosomal protein S5                                  | 0.089 |
| Cysteine-rich protein 1                                   | 0.087 |
| Prosaposin                                                | 0.087 |
| 40S ribosomal protein S26                                 | 0.086 |
| 40S ribosomal protein S28                                 | 0.085 |
| Bax inhibitor 1                                           | 0.085 |
| 60S ribosomal protein L26                                 | 0.085 |
| 60S ribosomal protein L35                                 | 0.084 |
| Tropomyosin alpha-1 chain                                 | 0.084 |
| Chloride intracellular channel protein 1                  | 0.084 |
| 60S ribosomal protein L36                                 | 0.083 |
| MHC class I                                               | 0.083 |
| Profilin-1                                                | 0.082 |
| Peptidyl-prolyl cis-trans isomerase A                     | 0.082 |
| 40S ribosomal protein S13                                 | 0.081 |
| C-C motif chemokine 25                                    | 0.080 |
| Tubulin beta-7 chain                                      | 0.080 |
| 40S ribosomal protein S16                                 | 0.079 |
| Alpha-actinin-1                                           | 0.079 |
| Myosin regulatory light polypeptide 9                     | 0.079 |
| CD24                                                      | 0.079 |
| 60S ribosomal protein L29                                 | 0.079 |
| Glyceraldehyde-3-phosphate dehydrogenase                  | 0.078 |
| CD9 antigen                                               | 0.077 |
| Nuclear protein 1                                         | 0.077 |
| 60S ribosomal protein L13a                                | 0.077 |

|                                                                 |       |
|-----------------------------------------------------------------|-------|
| Ribonuclease inhibitor                                          | 0.077 |
| Peroxiredoxin-1                                                 | 0.075 |
| 60S acidic ribosomal protein P0                                 | 0.075 |
| Thioredoxin-interacting protein                                 | 0.074 |
| Gelsolin                                                        | 0.074 |
| Protein S100-A11                                                | 0.074 |
| 60S ribosomal protein L22-like 1                                | 0.073 |
| Claudin-4                                                       | 0.072 |
| 40S ribosomal protein S10                                       | 0.072 |
| 40S ribosomal protein S23                                       | 0.071 |
| 60S ribosomal protein L35a                                      | 0.070 |
| Unknown-short transcript                                        | 0.070 |
| Heterogeneous nuclear ribonucleoprotein A1                      | 0.070 |
| Nuclease-sensitive element-binding protein 1                    | 0.070 |
| Calponin-1                                                      | 0.070 |
| Myeloid-associated differentiation marker                       | 0.069 |
| Reticulon-4                                                     | 0.069 |
| Actin-related protein 2/3 complex subunit 3                     | 0.069 |
| 60S ribosomal protein L24                                       | 0.069 |
| Lactadherin                                                     | 0.068 |
| 60S ribosomal protein L27a                                      | 0.067 |
| Cathelicidin Phci7                                              | 0.067 |
| Mucin-1                                                         | 0.066 |
| MHC class I                                                     | 0.064 |
| WAP four-disulfide core domain protein 2                        | 0.064 |
| Complement C1q subcomponent subunit A                           | 0.064 |
| Tubulin beta-4B chain                                           | 0.064 |
| Prelamin-A/C                                                    | 0.064 |
| Myosin-9                                                        | 0.064 |
| Eukaryotic initiation factor 4A-II                              | 0.063 |
| Selenium-binding protein 1                                      | 0.063 |
| Nucleophosmin                                                   | 0.063 |
| CCAAT/enhancer-binding protein delta                            | 0.063 |
| Collagen alpha-1(I) chain                                       | 0.063 |
| Protein S100-A6                                                 | 0.063 |
| Serpin H1                                                       | 0.063 |
| Cytochrome b reductase 1                                        | 0.063 |
| Minor histocompatibility antigen H13                            | 0.063 |
| 40S ribosomal protein S17                                       | 0.062 |
| 60S ribosomal protein L11                                       | 0.062 |
| Transmembrane and coiled-coil domain-containing protein 6       | 0.062 |
| ATP synthase subunit beta, mitochondrial                        | 0.062 |
| Coiled-coil-helix-coiled-coil-helix domain-containing protein 2 | 0.062 |
| 40S ribosomal protein S15a                                      | 0.061 |
| Augurin                                                         | 0.061 |
| Glutamine synthetase                                            | 0.060 |
| Protein NDRG2                                                   | 0.060 |
| Collagen alpha-2(I) chain                                       | 0.059 |
| 60S acidic ribosomal protein P2                                 | 0.059 |
| Pituitary tumor-transforming gene 1 protein-interacting protein | 0.059 |

|                                                  |       |
|--------------------------------------------------|-------|
| Cytochrome c oxidase subunit 6B1                 | 0.058 |
| Ornithine decarboxylase antizyme 1               | 0.058 |
| MHC class II DAB                                 | 0.058 |
| 14-3-3 protein theta                             | 0.058 |
| Claudin-1                                        | 0.058 |
| Glutathione peroxidase 1                         | 0.058 |
| 40S ribosomal protein S25                        | 0.057 |
| 14-3-3 protein beta/alpha                        | 0.057 |
| Glutathione S-transferase omega-1                | 0.056 |
| Amiloride-sensitive sodium channel subunit alpha | 0.056 |

Table S2: Complete list of proteins identified in the early lactation milk proteome

| Early Lactation Milk Proteome                        | % total peptides |
|------------------------------------------------------|------------------|
| Beta-lactoglobulin                                   | 15.59            |
| Very early lactation protein                         | 13.3             |
| Zinc-alpha-2-glycoprotein                            | 7.1              |
| Haptoglobin                                          | 5.46             |
| Early lactation protein                              | 3.77             |
| Whey acidic protein                                  | 3.56             |
| Trichosurin                                          | 3.4              |
| Clusterin                                            | 2.37             |
| Alpha-1-B glycoprotein-like                          | 1.48             |
| Beta-casein                                          | 1.44             |
| Gelsolin                                             | 1.44             |
| Polymeric immunoglobulin receptor                    | 1.39             |
| Complement C3                                        | 1.15             |
| Envelope glycoprotein (KoRV)                         | 0.97             |
| Sulfhydryl oxidase 1                                 | 0.91             |
| Complement C2                                        | 0.86             |
| Alpha-lactalbumin                                    | 0.81             |
| Alpha-S1-casein                                      | 0.77             |
| Alpha-1-antiproteinase                               | 0.75             |
| Lactadherin                                          | 0.73             |
| Neutrophil gelatinase-associated lipocalin           | 0.71             |
| Hemoglobin subunit beta                              | 0.69             |
| Ig gamma chain C region                              | 0.68             |
| Nucleobindin-1                                       | 0.64             |
| Hemoglobin subunit alpha                             | 0.55             |
| Marsupial Milk 1                                     | 0.54             |
| Actin, aortic smooth muscle                          | 0.52             |
| 78 kDa glucose-regulated protein                     | 0.51             |
| Lipopolysaccharide-binding protein                   | 0.47             |
| Serum amyloid A protein                              | 0.46             |
| WAP four-disulfide core domain protein 2             | 0.45             |
| Leucine-rich alpha-2-glycoprotein                    | 0.43             |
| Monocyte differentiation antigen CD14                | 0.42             |
| Peroxiredoxin-1                                      | 0.41             |
| Complement C4-A                                      | 0.4              |
| Alpha-2-macroglobulin                                | 0.38             |
| Peroxidasin homolog                                  | 0.38             |
| Tumor necrosis factor receptor superfamily member 6B | 0.38             |
| Amyloid beta A4 protein                              | 0.36             |
| Elastin                                              | 0.34             |
| Fibronectin                                          | 0.34             |
| Cathepsin L1                                         | 0.32             |
| C-C motif chemokine 3                                | 0.29             |
| Ceruloplasmin                                        | 0.29             |
| Prosaposin                                           | 0.29             |

|                                                                   |      |
|-------------------------------------------------------------------|------|
| Fibroblast growth factor-binding protein 2                        | 0.26 |
| Histone-lysine N-methyltransferase 2C                             | 0.25 |
| Ig mu chain C region                                              | 0.25 |
| Peroxisomal oxidase, mitochondrial                                | 0.25 |
| EGF-containing fibulin-like extracellular matrix protein 1        | 0.24 |
| Granulins                                                         | 0.21 |
| Alpha-enolase                                                     | 0.2  |
| Follistatin-related protein 1                                     | 0.2  |
| Brain-specific serine protease 4                                  | 0.19 |
| Lactotransferrin                                                  | 0.19 |
| L-amino-acid oxidase                                              | 0.19 |
| Nidogen-1                                                         | 0.19 |
| Nucleolar protein of 40 kDa                                       | 0.19 |
| Fibulin-2                                                         | 0.18 |
| Complement factor H                                               | 0.17 |
| MHC class I                                                       | 0.17 |
| Receptor-type tyrosine-protein phosphatase F                      | 0.17 |
| Xanthine dehydrogenase/oxidase                                    | 0.17 |
| Endothelial lipase                                                | 0.16 |
| Immunoglobulin superfamily containing leucine-rich repeat protein | 0.16 |
| Major allergen I polypeptide chain 1-like                         | 0.16 |
| Nucleoside diphosphate kinase B                                   | 0.16 |
| Protein DJ-1                                                      | 0.16 |
| Actin, cytoplasmic 2                                              | 0.15 |
| Cadherin-1                                                        | 0.15 |
| CD9 antigen                                                       | 0.15 |
| Desmocollin-2                                                     | 0.15 |
| Dickkopf-related protein 3                                        | 0.15 |
| Tetranectin                                                       | 0.15 |
| Beta-2-microglobulin                                              | 0.14 |
| Cathepsin F                                                       | 0.14 |
| C-C motif chemokine 25                                            | 0.14 |
| Macrophage migration inhibitory factor                            | 0.14 |
| Butyrophilin subfamily 1 member A1                                | 0.13 |
| Dipeptidase 2                                                     | 0.13 |
| Golgi membrane protein 1                                          | 0.13 |
| Kappa casein                                                      | 0.13 |
| Calcium-activated chloride channel regulator 1                    | 0.12 |
| Glutathione peroxidase 3                                          | 0.12 |
| Kininogen-1                                                       | 0.12 |
| Lumican                                                           | 0.12 |
| Nucleobindin-2                                                    | 0.12 |
| Protein FAM3D                                                     | 0.12 |
| Selenium-binding protein 1                                        | 0.12 |
| Angiopoietin-related protein 4                                    | 0.11 |
| Ig lambda chain V region                                          | 0.11 |
| Pancreatic secretory granule membrane major glycoprotein GP2      | 0.11 |
| Pigment epithelium-derived factor                                 | 0.11 |
| Ephrin-A1                                                         | 0.1  |
| Extracellular matrix protein 1                                    | 0.1  |



|                                                       |      |
|-------------------------------------------------------|------|
| HHIP-like protein 2                                   | 0.1  |
| Ig kappa chain C region                               | 0.1  |
| Lipoprotein lipase                                    | 0.1  |
| Pro-Pol polyprotein (KoRV)                            | 0.1  |
| Acid ceramidase                                       | 0.09 |
| Calsyntenin-1                                         | 0.09 |
| Copper transport protein ATOX1                        | 0.09 |
| Cystatin-C                                            | 0.09 |
| Fibulin-1                                             | 0.09 |
| Fructose-bisphosphate aldolase A                      | 0.09 |
| Papilin                                               | 0.09 |
| Prostaglandin-H2 D-isomerase                          | 0.09 |
| Retinol-binding protein 4                             | 0.09 |
| Testican-1                                            | 0.09 |
| Vacuolar protein sorting-associated protein 54        | 0.09 |
| Catalase                                              | 0.08 |
| Glyceraldehyde-3-phosphate dehydrogenase              | 0.08 |
| Ig alpha chain C region                               | 0.08 |
| Matrilysin                                            | 0.08 |
| Peptidyl-prolyl cis-trans isomerase A                 | 0.08 |
| Peptidyl-prolyl cis-trans isomerase B                 | 0.08 |
| Plasma protease C1 inhibitor                          | 0.08 |
| Protein disulfide-isomerase A3                        | 0.08 |
| Thioredoxin                                           | 0.08 |
| Acid sphingomyelinase-like phosphodiesterase 3a       | 0.07 |
| Cathelicidin Phci1                                    | 0.07 |
| Chloride intracellular channel protein 1              | 0.07 |
| Platelet glycoprotein 4                               | 0.07 |
| Triosephosphate isomerase                             | 0.07 |
| C4b-binding protein alpha chain                       | 0.06 |
| Complement C1s subcomponent                           | 0.06 |
| Creatine kinase B-type                                | 0.06 |
| Extracellular superoxide dismutase [Cu-Zn]            | 0.06 |
| Growth-regulated alpha protein                        | 0.06 |
| Homeobox protein Hox-B2                               | 0.06 |
| Inorganic pyrophosphatase                             | 0.06 |
| Insulin-like growth factor-binding protein 2          | 0.06 |
| Inter-alpha-trypsin inhibitor heavy chain H3          | 0.06 |
| Protein FAM20A                                        | 0.06 |
| Transforming growth factor-beta-induced protein ig-h3 | 0.06 |
| UPF0538 protein C2orf76 homolog                       | 0.06 |
| 4F2 cell-surface antigen heavy chain                  | 0.05 |
| Beta-1,4-galactosyltransferase 1                      | 0.05 |
| Cytochrome c oxidase subunit 7A2, mitochondrial       | 0.05 |
| Epithelial discoidin domain-containing receptor 1     | 0.05 |
| G1/S-specific cyclin-E1                               | 0.05 |
| Golgi apparatus protein 1                             | 0.05 |
| Lysosomal protein NCU-G1                              | 0.05 |
| Semaphorin-7A                                         | 0.05 |
| Tubulin alpha-4A chain                                | 0.05 |

|                                                                                        |      |
|----------------------------------------------------------------------------------------|------|
| WD repeat-containing and planar cell polarity effector protein fritz homolog           | 0.05 |
| 45 kDa calcium-binding protein                                                         | 0.04 |
| Beta-enolase                                                                           | 0.04 |
| Beta-hexosaminidase subunit beta                                                       | 0.04 |
| Carboxypeptidase Q                                                                     | 0.04 |
| Cathepsin D                                                                            | 0.04 |
| DNA-directed RNA polymerase II subunit RPB2                                            | 0.04 |
| Epithelial cell adhesion molecule                                                      | 0.04 |
| Extracellular serine/threonine protein kinase FAM20C                                   | 0.04 |
| Glucose-6-phosphate isomerase                                                          | 0.04 |
| Glucosylceramidase                                                                     | 0.04 |
| Histone acetyltransferase KAT8                                                         | 0.04 |
| Hypoxia up-regulated protein 1                                                         | 0.04 |
| Kunitz-type protease inhibitor 1                                                       | 0.04 |
| Multiple coagulation factor deficiency protein 2 homolog                               | 0.04 |
| Protein FAM20A                                                                         | 0.04 |
| Transmembrane protein 200C                                                             | 0.04 |
| Unknown                                                                                | 0.04 |
| V-type proton ATPase subunit S1                                                        | 0.04 |
| 10 kDa heat shock protein, mitochondrial                                               | 0.03 |
| 72 kDa type IV collagenase                                                             | 0.03 |
| Agrin                                                                                  | 0.03 |
| Beta-galactosidase                                                                     | 0.03 |
| Calumenin                                                                              | 0.03 |
| CD81 antigen                                                                           | 0.03 |
| CMP-N-acetylneuraminate-beta-galactosamide-alpha-2,3-sialyltransferase 1               | 0.03 |
| Collagen alpha-1(XII) chain                                                            | 0.03 |
| Drebrin-like protein                                                                   | 0.03 |
| Elongation factor 1-alpha 1                                                            | 0.03 |
| Glycerophosphodiester phosphodiesterase domain-containing protein 3                    | 0.03 |
| G-protein coupled receptor 64                                                          | 0.03 |
| Hephaestin-like protein 1                                                              | 0.03 |
| Insulin-like growth factor-binding protein 4                                           | 0.03 |
| Insulin-like growth factor-binding protein 5                                           | 0.03 |
| Multiple inositol polyphosphate phosphatase 1                                          | 0.03 |
| Peroxiredoxin-4                                                                        | 0.03 |
| Phospholipase D3                                                                       | 0.03 |
| Procollagen-lysine,2-oxoglutarate 5-dioxygenase 1                                      | 0.03 |
| Protein disulfide-isomerase                                                            | 0.03 |
| Protein FAM188A                                                                        | 0.03 |
| Rho GDP-dissociation inhibitor 1                                                       | 0.03 |
| RUN domain-containing protein 1                                                        | 0.03 |
| Thrombospondin-1                                                                       | 0.03 |
| Zinc finger protein 292                                                                | 0.03 |
| Alpha-N-acetylglucosaminidase                                                          | 0.02 |
| Angiomotin like 1                                                                      | 0.02 |
| ATP-dependent RNA helicase DDX39A                                                      | 0.02 |
| Beta-1,3-galactosyl-O-glycosyl-glycoprotein beta-1,6-N-acetylglucosaminyltransferase 3 | 0.02 |
| Cadherin-3                                                                             | 0.02 |

|                                                     |      |
|-----------------------------------------------------|------|
| CD44 antigen                                        | 0.02 |
| Cell division control protein 42 homolog            | 0.02 |
| Complement component C7                             | 0.02 |
| Dystroglycan                                        | 0.02 |
| Endothelin-1                                        | 0.02 |
| Gasdermin-A                                         | 0.02 |
| Glucosidase 2 subunit beta                          | 0.02 |
| Insulin-like growth factor-binding protein 3        | 0.02 |
| Laminin subunit beta-2                              | 0.02 |
| Low affinity immunoglobulin epsilon Fc receptor     | 0.02 |
| Low-density lipoprotein receptor-related protein 11 | 0.02 |
| Neogenin                                            | 0.02 |
| Neutral alpha-glucosidase AB                        | 0.02 |
| Nodal modulator 1                                   | 0.02 |
| Plastin-2                                           | 0.02 |
| Plexin-B2                                           | 0.02 |
| Protein CREG1                                       | 0.02 |
| Protein disulfide-isomerase A6                      | 0.02 |
| Protein NDNF                                        | 0.02 |
| Ras-related protein Rap-1A                          | 0.02 |
| Receptor-type tyrosine-protein phosphatase F        | 0.02 |
| RING finger protein 39                              | 0.02 |
| Splicing factor, arginine/serine-rich 15            | 0.02 |
| Transforming growth factor beta receptor type 3     | 0.02 |
| Calmodulin                                          | 0.01 |
| Collagen alpha-2(IV) chain                          | 0.01 |
| Collagen alpha-3(VI) chain                          | 0.01 |
| Guanine deaminase                                   | 0.01 |
| Importin-4                                          | 0.01 |
| Macrophage mannose receptor 1                       | 0.01 |
| Nidogen-2                                           | 0.01 |
| Protein FAM3C                                       | 0.01 |
| IgG FcRN receptor                                   | 0.01 |
| Semaphorin-3C                                       | 0.01 |
| Transcription factor 25                             | 0.01 |
| von Willebrand factor                               | 0.01 |

Table S3: Complete list of proteins identified in the late lactation milk proteome

| Late Lactation Milk Proteome                 | % total peptides |
|----------------------------------------------|------------------|
| Lactotransferrin                             | 49.4             |
| Beta-lactoglobulin                           | 10.53            |
| Ig alpha chain C region                      | 2.16             |
| Immunoglobulin J chain                       | 1.96             |
| Zinc-alpha-2-glycoprotein                    | 1.91             |
| Haptoglobin                                  | 1.73             |
| Neutrophil gelatinase-associated lipocalin   | 1.67             |
| Protein S100-A8                              | 1.67             |
| Lactadherin                                  | 1.6              |
| Beta-casein                                  | 1.53             |
| Trichosurin                                  | 1.44             |
| Polymeric immunoglobulin receptor            | 1.27             |
| Very early lactation protein                 | 1.25             |
| Hemoglobin subunit alpha                     | 1.07             |
| Sulfhydryl oxidase 1                         | 0.94             |
| Clusterin                                    | 0.85             |
| Alpha-1-B glycoprotein-like                  | 0.74             |
| Vimentin                                     | 0.74             |
| Alpha-enolase                                | 0.72             |
| Whey acidic protein                          | 0.72             |
| Nucleobindin-1                               | 0.71             |
| Peptidyl-prolyl cis-trans isomerase A        | 0.71             |
| Transketolase                                | 0.6              |
| Peroxiredoxin-1                              | 0.59             |
| Protein S100-A9                              | 0.59             |
| Ig kappa chain C region                      | 0.58             |
| 78 kDa glucose-regulated protein             | 0.56             |
| Cathepsin L1                                 | 0.56             |
| Ig lambda chain V region                     | 0.51             |
| Phosphoglycerate mutase 1                    | 0.51             |
| Actin, cytoplasmic 2                         | 0.5              |
| Alpha-S1-casein                              | 0.47             |
| Ig gamma-1 chain C region                    | 0.46             |
| Kappa Casein                                 | 0.45             |
| Alpha-lactalbumin                            | 0.44             |
| Protein disulfide-isomerase A3               | 0.44             |
| Insulin-like growth factor-binding protein 4 | 0.42             |
| Envelope glycoprotein (KoRV)                 | 0.4              |
| Ubiquitin-60S ribosomal protein L40          | 0.4              |
| Pigment epithelium-derived factor            | 0.39             |
| Profilin-1                                   | 0.39             |
| Marsupial Milk 1                             | 0.37             |
| Gelsolin                                     | 0.35             |
| Pro-Pol polyprotein (KoRV)                   | 0.3              |
| Retinoic acid receptor responder protein 1   | 0.3              |

|                                                              |      |
|--------------------------------------------------------------|------|
| Xanthine dehydrogenase/oxidase                               | 0.29 |
| Dipeptidase 2                                                | 0.27 |
| Ig heavy chain V-III region VH26                             | 0.27 |
| Leukocyte elastase inhibitor                                 | 0.27 |
| Glucose-6-phosphate isomerase                                | 0.26 |
| Lysozyme C                                                   | 0.25 |
| Butyrophilin subfamily 1 member A1                           | 0.22 |
| Parathyroid hormone-related protein                          | 0.22 |
| Extracellular matrix protein 1                               | 0.21 |
| Pyruvate kinase PKM                                          | 0.21 |
| Cysteine-rich secretory protein 2                            | 0.2  |
| Leucine-rich alpha-2-glycoprotein                            | 0.2  |
| Beta-2-microglobulin                                         | 0.19 |
| Cathepsin F                                                  | 0.19 |
| Collagen, type VI, alpha 3                                   | 0.19 |
| Complement C2                                                | 0.19 |
| L-lactate dehydrogenase A chain                              | 0.19 |
| Moesin                                                       | 0.19 |
| Nucleolar protein of 40 kDa                                  | 0.19 |
| Phosphoglycerate kinase 1                                    | 0.19 |
| Annexin A1                                                   | 0.17 |
| Complement C3                                                | 0.17 |
| Coronin-1A                                                   | 0.17 |
| C10orf99-like                                                | 0.16 |
| Matrix metalloproteinase-9                                   | 0.16 |
| Monocyte differentiation antigen CD14                        | 0.16 |
| Phosphoglucomutase 5                                         | 0.16 |
| Thrombospondin-1                                             | 0.16 |
| Adenosylhomocysteinase                                       | 0.15 |
| Angiopoietin-related protein 4                               | 0.15 |
| Plastin-2                                                    | 0.15 |
| Transaldolase                                                | 0.15 |
| C-C motif chemokine 25                                       | 0.14 |
| Cystatin-M                                                   | 0.14 |
| Resistin-like beta                                           | 0.14 |
| Sphingomyelin phosphodiesterase                              | 0.14 |
| Glyceraldehyde-3-phosphate dehydrogenase                     | 0.13 |
| Heat shock cognate 71 kDa protein                            | 0.13 |
| Histone-lysine N-methyltransferase 2C                        | 0.13 |
| Proteasome subunit beta type-2                               | 0.13 |
| L-lactate dehydrogenase B chain                              | 0.12 |
| Peroxisomal oxidoreductin-5, mitochondrial                   | 0.12 |
| Augurin                                                      | 0.11 |
| Copper transport protein ATOX1                               | 0.11 |
| Myosin light polypeptide 6                                   | 0.11 |
| Pancreatic secretory granule membrane major glycoprotein GP2 | 0.11 |
| Peptidoglycan recognition protein 1                          | 0.11 |
| Triosephosphate isomerase                                    | 0.11 |
| Cathelicidin Phci6                                           | 0.1  |
| Cell death activator CIDE-A                                  | 0.1  |

|                                                                   |      |
|-------------------------------------------------------------------|------|
| Cytochrome b-245 light chain                                      | 0.1  |
| Heat shock protein HSP 90-alpha                                   | 0.1  |
| Heat shock protein HSP 90-beta                                    | 0.1  |
| Neutral alpha-glucosidase AB                                      | 0.1  |
| Adenylyl cyclase-associated protein 1                             | 0.09 |
| Alpha-1-antiproteinase                                            | 0.09 |
| Brain acid soluble protein 1 homolog                              | 0.09 |
| Endoplasmic reticulum resident protein 44                         | 0.09 |
| Fructose-bisphosphate aldolase A                                  | 0.09 |
| Histone H1.2                                                      | 0.09 |
| 40S ribosomal protein SA                                          | 0.08 |
| Glucosidase 2 subunit beta                                        | 0.08 |
| Insulin-like growth factor-binding protein 6                      | 0.08 |
| Nucleoside diphosphate kinase B                                   | 0.08 |
| Protein DJ-1                                                      | 0.08 |
| Thymidine phosphorylase                                           | 0.08 |
| WAP four-disulfide core domain protein 2                          | 0.08 |
| 1,5-anhydro-D-fructose reductase                                  | 0.07 |
| Cathelicidin Phci1                                                | 0.07 |
| Chloride intracellular channel protein 1                          | 0.07 |
| F-actin-capping protein subunit alpha-1                           | 0.07 |
| Golgi membrane protein 1                                          | 0.07 |
| Proteasome subunit alpha type-1                                   | 0.07 |
| Transforming growth factor beta receptor type 3                   | 0.07 |
| 26S proteasome non-ATPase regulatory subunit 7                    | 0.06 |
| Apolipoprotein E                                                  | 0.06 |
| Cadherin-1                                                        | 0.06 |
| Cystatin-C                                                        | 0.06 |
| Ezrin                                                             | 0.06 |
| Growth-regulated alpha protein                                    | 0.06 |
| High mobility group protein B2                                    | 0.06 |
| Homeobox protein Hox-B2                                           | 0.06 |
| Hypoxia up-regulated protein 1                                    | 0.06 |
| Lamin-B2                                                          | 0.06 |
| Protein disulfide-isomerase                                       | 0.06 |
| Complement C4-A                                                   | 0.05 |
| Ephrin-A1                                                         | 0.05 |
| Glutathione reductase, mitochondrial                              | 0.05 |
| Histone H1x                                                       | 0.05 |
| Hsp90 co-chaperone Cdc37                                          | 0.05 |
| Inosine-5'-monophosphate dehydrogenase 2                          | 0.05 |
| Lipoprotein lipase                                                | 0.05 |
| Macrophage-capping protein                                        | 0.05 |
| Nucleobindin-2                                                    | 0.05 |
| Programmed cell death 6-interacting protein                       | 0.05 |
| Protein FAM20A                                                    | 0.05 |
| Protein kinase C and casein kinase substrate in neurons protein 2 | 0.05 |
| Tigger transposable element-derived protein 5                     | 0.05 |
| Vasodilator-stimulated phosphoprotein                             | 0.05 |
| 14-3-3 protein beta/alpha                                         | 0.04 |

|                                                               |      |
|---------------------------------------------------------------|------|
| Actin-related protein 2/3 complex subunit 1B                  | 0.04 |
| Alpha-2-macroglobulin                                         | 0.04 |
| Alpha-actinin-1                                               | 0.04 |
| ATP synthase subunit beta, mitochondrial                      | 0.04 |
| Carboxypeptidase D                                            | 0.04 |
| Catalase                                                      | 0.04 |
| Cytosol aminopeptidase                                        | 0.04 |
| Glia-derived nexin                                            | 0.04 |
| Granulins                                                     | 0.04 |
| Heterogeneous nuclear ribonucleoprotein D0                    | 0.04 |
| Lysosome-associated membrane glycoprotein 1                   | 0.04 |
| Malate dehydrogenase, mitochondrial                           | 0.04 |
| Plasminogen activator inhibitor 1 RNA-binding protein         | 0.04 |
| Protein disulfide-isomerase A6                                | 0.04 |
| Protein OS-9                                                  | 0.04 |
| Protein-L-isoaspartate(D-aspartate) O-methyltransferase       | 0.04 |
| Ras-related protein Rap-1b                                    | 0.04 |
| Ribonuclease 8                                                | 0.04 |
| Transforming protein RhoA                                     | 0.04 |
| Tropomyosin alpha-3 chain                                     | 0.04 |
| Unknown                                                       | 0.04 |
| 10 kDa heat shock protein, mitochondrial                      | 0.03 |
| Acid sphingomyelinase-like phosphodiesterase 3a               | 0.03 |
| Actin-related protein 3                                       | 0.03 |
| Calsyntenin-1                                                 | 0.03 |
| Calumenin                                                     | 0.03 |
| Cytoskeleton-associated protein 4                             | 0.03 |
| Endoplasmin                                                   | 0.03 |
| Fibronectin                                                   | 0.03 |
| Gag polyprotein (KoRV)                                        | 0.03 |
| Histone H2B type 2-E                                          | 0.03 |
| Kynurenine--oxoglutarate transaminase 3                       | 0.03 |
| Leukotriene A-4 hydrolase                                     | 0.03 |
| Perilipin-2                                                   | 0.03 |
| Platelet-derived growth factor subunit A                      | 0.03 |
| Procollagen-lysine,2-oxoglutarate 5-dioxygenase 3             | 0.03 |
| Prosaposin                                                    | 0.03 |
| Protein NOXP20                                                | 0.03 |
| Protein phosphatase 1 regulatory subunit 26                   | 0.03 |
| Src substrate cortactin                                       | 0.03 |
| Succinyl-CoA ligase [ADP-forming] subunit beta, mitochondrial | 0.03 |
| Talin-1                                                       | 0.03 |
| Transforming growth factor-beta-induced protein ig-h3         | 0.03 |
| Unconventional myosin-Id                                      | 0.03 |
| 1,4-alpha-glucan-branching enzyme                             | 0.02 |
| Aconitate hydratase, mitochondrial                            | 0.02 |
| Beta-1,4-galactosyltransferase 1                              | 0.02 |
| Beta-galactoside alpha-2,6-sialyltransferase 1                | 0.02 |
| Calcium-independent phospholipase A2-gamma                    | 0.02 |
| CapZ-interacting protein                                      | 0.02 |

|                                                                |      |
|----------------------------------------------------------------|------|
| CD44 antigen                                                   | 0.02 |
| Cell division control protein 42 homolog                       | 0.02 |
| Coatomer subunit delta                                         | 0.02 |
| Complement C1r subcomponent                                    | 0.02 |
| Cyclic AMP-responsive element-binding protein 3-like protein 2 | 0.02 |
| Eukaryotic translation initiation factor 5A-2                  | 0.02 |
| Exostosin-1                                                    | 0.02 |
| Extracellular serine/threonine protein kinase FAM20C           | 0.02 |
| Family With Sequence Similarity 168, Member B                  | 0.02 |
| G-protein coupled receptor 56                                  | 0.02 |
| Laminin subunit beta-2                                         | 0.02 |
| Low-density lipoprotein receptor-related protein 11            | 0.02 |
| Lysosomal alpha-mannosidase                                    | 0.02 |
| Myotubularin-related protein 6                                 | 0.02 |
| Platelet glycoprotein 4                                        | 0.02 |
| Protein BEAN1                                                  | 0.02 |
| Puromycin-sensitive aminopeptidase                             | 0.02 |
| Pyridoxal kinase                                               | 0.02 |
| Ras GTPase-activating-like protein IQGAP1                      | 0.02 |
| Receptor-type tyrosine-protein phosphatase F                   | 0.02 |
| RecQ-mediated genome instability protein 1                     | 0.02 |
| Serine/threonine-protein kinase 17B                            | 0.02 |
| Sperm-associated antigen 1                                     | 0.02 |
| Splicing factor, arginine/serine-rich 15                       | 0.02 |
| Translation factor GUF1, mitochondrial                         | 0.02 |
| Tubulin beta-7 chain                                           | 0.02 |
| Ubiquitin-conjugating enzyme E2 J1                             | 0.02 |
| Collagen alpha-2(IV) chain                                     | 0.01 |
| Eukaryotic translation initiation factor 4H                    | 0.01 |
| Golgi apparatus protein 1                                      | 0.01 |
| Insulin-like growth factor I                                   | 0.01 |
| Insulin-like growth factor-binding protein 5                   | 0.01 |
| Interleukin enhancer-binding factor 3                          | 0.01 |
| Nidogen-1                                                      | 0.01 |
| Pantothenate kinase 3                                          | 0.01 |
| Protein FAM208B                                                | 0.01 |
| Sine oculis-binding protein homolog                            | 0.01 |
| Structural maintenance of chromosomes protein 1A               | 0.01 |
| UDP-glucose:glycoprotein glucosyltransferase 1                 | 0.01 |
| Vacuolar protein sorting-associated protein 54                 | 0.01 |



Table S4: List of immune transcripts identified in mammary gland transcriptome

| Gene      | % total |
|-----------|---------|
| FTH1      | 1.5542  |
| BTN1A1    | 0.6011  |
| AZGP1     | 0.4279  |
| MHCI      | 0.1966  |
| FTL       | 0.1418  |
| TPT1      | 0.1150  |
| MUC1      | 0.1054  |
| CD74      | 0.1010  |
| B2M       | 0.0962  |
| CD63      | 0.0960  |
| PIGR      | 0.0904  |
| MHCI      | 0.0827  |
| CCL25     | 0.0801  |
| CD9       | 0.0775  |
| PRDX1     | 0.0753  |
| Phci7     | 0.0669  |
| MHCI      | 0.0642  |
| C1QA      | 0.0641  |
| MHCII-DAB | 0.0580  |
| MHCII-DAA | 0.0525  |
| C1S       | 0.0517  |
| CTGF      | 0.0495  |
| Phci1     | 0.0491  |
| IFITM2    | 0.0440  |
| SERPING1  | 0.0389  |
| THBS1     | 0.0374  |
| HSPA1L    | 0.0359  |
| C1QC      | 0.0355  |
| ANXA5     | 0.0348  |
| CALR      | 0.0347  |
| EPCAM     | 0.0338  |
| CLEC3B    | 0.0337  |
| CCLK4     | 0.0330  |
| CD47      | 0.0322  |
| ACKR4     | 0.0313  |
| APLP2     | 0.0302  |
| BCAP31    | 0.0302  |
| MIF       | 0.0293  |
| HM13      | 0.0290  |
| PRDX2     | 0.0274  |
| ITGB1     | 0.0272  |
| LGALS1    | 0.0271  |
| DAP1      | 0.0268  |
| THY1      | 0.0254  |
| PSMD8     | 0.0244  |

|         |        |
|---------|--------|
| FCGR2   | 0.0240 |
| MME     | 0.0233 |
| IL25    | 0.0230 |
| IL1RL2  | 0.0228 |
| IL10RB  | 0.0219 |
| JUN     | 0.0216 |
| MHCII   | 0.0213 |
| LRPAP1  | 0.0197 |
| VTCN1   | 0.0197 |
| PDIA3   | 0.0191 |
| CASP14  | 0.0190 |
| FKBP1A  | 0.0189 |
| CTSL    | 0.0187 |
| PDCD4   | 0.0186 |
| PBX1    | 0.0184 |
| ISLR    | 0.0184 |
| S10A2   | 0.0183 |
| CXCL12  | 0.0181 |
| PRNP    | 0.0180 |
| HPT     | 0.0179 |
| AIMP1   | 0.0178 |
| IL20RA  | 0.0177 |
| PPIB    | 0.0172 |
| GADD45A | 0.0165 |
| BTN2A2  | 0.0159 |
| EDN1    | 0.0159 |
| PSMB7   | 0.0157 |
| MAGEC1  | 0.0155 |
| PSMD2   | 0.0155 |
| MCAM    | 0.0155 |
| PSMB2   | 0.0153 |
| HSPD1   | 0.0152 |
| PSMB1   | 0.0147 |
| BSG     | 0.0147 |
| PSMC4   | 0.0144 |
| TUBB5   | 0.0144 |
| CD14    | 0.0143 |
| TSC22D3 | 0.0142 |
| CANX    | 0.0141 |
| F11R    | 0.0139 |
| PSME2   | 0.0138 |
| LTF     | 0.0138 |
| CCL20   | 0.0138 |
| ANXA11  | 0.0136 |
| LYZ     | 0.0135 |
| CD164   | 0.0135 |
| MAPK3   | 0.0134 |
| LAP3    | 0.0132 |
| CD36    | 0.0131 |
| BANF1   | 0.0128 |

|         |        |
|---------|--------|
| STAT3   | 0.0128 |
| MHCI    | 0.0128 |
| CCL21   | 0.0124 |
| CSNK2   | 0.0123 |
| JUND    | 0.0122 |
| CO4A    | 0.0122 |
| SLC11A1 | 0.0120 |
| IFI30   | 0.0119 |
| STAT2   | 0.0119 |
| ARHGDIG | 0.0119 |
| PVRL2   | 0.0119 |
| FGL2    | 0.0119 |
| BRD2    | 0.0118 |
| FKBP8   | 0.0114 |
| PSMD7   | 0.0111 |
| JAK1    | 0.0111 |
| RELA    | 0.0110 |
| PSME1   | 0.0109 |
| MHCII   | 0.0106 |
| VATG1   | 0.0106 |
| ARF6    | 0.0104 |
| PSMA6   | 0.0102 |
| FCER1G  | 0.0102 |
| PACS1   | 0.0102 |
| IK      | 0.0101 |
| STAT5A  | 0.0101 |
| PSA1    | 0.0101 |
| AGPAT1  | 0.0101 |
| NCOA4   | 0.0101 |
| XIAP    | 0.0100 |
| PGF     | 0.0100 |
| SOD2    | 0.0098 |
| IER3    | 0.0097 |
| CTSH    | 0.0096 |
| CEBPB   | 0.0096 |
| ITGA6   | 0.0093 |
| SLC3A2  | 0.0092 |
| BRD2    | 0.0092 |
| TAP1    | 0.0091 |
| MAPK1   | 0.0091 |
| LIPL    | 0.0091 |
| IL1R2   | 0.0090 |
| ENG     | 0.0090 |
| LY96    | 0.0090 |
| C2      | 0.0089 |
| ADIPOQ  | 0.0089 |
| TYROBP  | 0.0088 |
| WARS    | 0.0087 |
| CCL19   | 0.0087 |
| CFLAR   | 0.0086 |

|          |        |
|----------|--------|
| BAX      | 0.0086 |
| LITAF    | 0.0085 |
| BAT1     | 0.0085 |
| IL4RA    | 0.0085 |
| HMGB2    | 0.0084 |
| ASC      | 0.0084 |
| AXL      | 0.0083 |
| ITGA2    | 0.0083 |
| PSMA4    | 0.0082 |
| TNFRSF1A | 0.0082 |
| PSB3     | 0.0081 |
| DDAH2    | 0.0081 |
| A2MG     | 0.0081 |
| ADAM9    | 0.0081 |
| SET      | 0.0079 |
| F10      | 0.0079 |
| TNFSF10  | 0.0079 |
| ERBB3    | 0.0078 |
| IL13RA1  | 0.0077 |
| DDT      | 0.0077 |
| XBP1     | 0.0076 |
| BCAM     | 0.0076 |
| TBB2A    | 0.0075 |
| INGR1    | 0.0074 |
| SIRPA    | 0.0074 |
| IFNAR1   | 0.0074 |
| JUNB     | 0.0073 |
| C1R      | 0.0072 |
| TAPBP    | 0.0072 |
| PDGFRB   | 0.0070 |
| MCFD2    | 0.0070 |
| CTL2     | 0.0069 |
| MHCI     | 0.0069 |
| AIF1     | 0.0069 |
| MHCI     | 0.0069 |
| PSA7     | 0.0068 |
| CTSS     | 0.0067 |
| PLSCR4   | 0.0067 |
| SCARB1   | 0.0067 |
| NFKBIA   | 0.0067 |
| ILF2     | 0.0066 |
| ATF6B    | 0.0066 |
| VWF      | 0.0066 |
| OAS1     | 0.0065 |
| NT5E     | 0.0065 |
| TNR3     | 0.0065 |
| SEM3C    | 0.0065 |
| BAT5     | 0.0065 |
| PSA2     | 0.0065 |
| CD44     | 0.0065 |

|         |        |
|---------|--------|
| FN1     | 0.0064 |
| RAF1    | 0.0064 |
| PDIA4   | 0.0064 |
| MAX     | 0.0064 |
| RN112   | 0.0064 |
| DMA     | 0.0064 |
| GADD45B | 0.0064 |
| ACKR3   | 0.0063 |
| PSMD13  | 0.0063 |
| C1QBP   | 0.0063 |
| SRGEF   | 0.0063 |
| LAMB1   | 0.0062 |
| PDGFA   | 0.0062 |
| PBX2    | 0.0062 |
| IL6ST   | 0.0061 |
| NRP1    | 0.0061 |
| CCLK5   | 0.0061 |
| BAG6    | 0.0061 |
| SIVA    | 0.0060 |
| PA1B3   | 0.0058 |
| CADH5   | 0.0058 |
| MAPK14  | 0.0058 |
| CD46    | 0.0058 |
| EIF6    | 0.0057 |
| EFEMP2  | 0.0057 |
| PTGES   | 0.0056 |
| SART3   | 0.0056 |
| ADML    | 0.0056 |
| SIRPB1  | 0.0056 |
| TAP2B   | 0.0056 |
| MAPK1   | 0.0056 |
| ITGB1   | 0.0055 |
| CASP3   | 0.0054 |
| CASP8   | 0.0054 |
| VDR     | 0.0054 |
| TFR1    | 0.0054 |
| HIMAP4  | 0.0054 |
| CAMLG   | 0.0054 |
| LSM2    | 0.0053 |
| PDCD6   | 0.0053 |
| PRRC2A  | 0.0053 |
| MLLT4   | 0.0052 |
| NINJ1   | 0.0052 |
| ADAM17  | 0.0052 |
| TMX1    | 0.0052 |
| S100A9  | 0.0052 |
| FCER2   | 0.0052 |
| S100A8  | 0.0052 |
| ERAP1   | 0.0051 |
| SEM3A   | 0.0051 |

|          |        |
|----------|--------|
| IL1RN    | 0.0050 |
| MAP4K4   | 0.0050 |
| PSMA5    | 0.0050 |
| SERPINB9 | 0.0050 |
| KIT      | 0.0049 |
| KBRS2    | 0.0049 |
| PSMD1    | 0.0049 |
| AHR      | 0.0049 |
| CCLK3    | 0.0048 |
| BAG3     | 0.0048 |
| ARNT     | 0.0048 |
| MRC1     | 0.0048 |
| EHMT2    | 0.0048 |
| PRDX3    | 0.0048 |
| ABI1     | 0.0048 |
| ISGF3G   | 0.0047 |
| SCAR3    | 0.0047 |
| PAR3     | 0.0047 |
| CD53     | 0.0047 |
| MAP3K1   | 0.0047 |
| IKBKG    | 0.0047 |
| CFAB     | 0.0046 |
| SFTPD    | 0.0046 |
| ELMO3    | 0.0046 |
| MAFB     | 0.0046 |
| ETS1     | 0.0045 |
| TNFAIP1  | 0.0045 |
| F2RL1    | 0.0044 |
| KIG8     | 0.0044 |
| IRF2     | 0.0044 |
| TLR2     | 0.0044 |
| GATA3    | 0.0044 |
| GGCX     | 0.0044 |
| MP2K1    | 0.0043 |
| PSMA3    | 0.0043 |
| TOLIP    | 0.0043 |
| IGHK     | 0.0043 |
| SIGIRR   | 0.0043 |
| AOX1     | 0.0043 |
| ILF3     | 0.0043 |
| PTGS2    | 0.0042 |
| SOCS2    | 0.0042 |
| RNF5     | 0.0041 |
| SEM7A    | 0.0040 |
| LGALS9   | 0.0040 |
| LMAN1    | 0.0040 |
| IRF6     | 0.0040 |
| SIGLEC9  | 0.0040 |
| ACP1     | 0.0040 |
| IGSF8    | 0.0039 |

|           |        |
|-----------|--------|
| SOCS3     | 0.0039 |
| NFKB2     | 0.0039 |
| ARHGDIB   | 0.0039 |
| STAT5B    | 0.0038 |
| PDGFB     | 0.0038 |
| PRKCD     | 0.0038 |
| PSD11     | 0.0038 |
| BIRC2     | 0.0038 |
| B3GALT3   | 0.0037 |
| HM13      | 0.0037 |
| F8        | 0.0037 |
| TNFSF10L  | 0.0036 |
| PLXB2     | 0.0036 |
| NKRF      | 0.0035 |
| CNIH1     | 0.0035 |
| PSMD12    | 0.0035 |
| SAMHD1    | 0.0035 |
| IL11RA    | 0.0034 |
| LBP       | 0.0034 |
| IMA5      | 0.0034 |
| CCLK2     | 0.0034 |
| PSMD9     | 0.0034 |
| YARS      | 0.0034 |
| UBE2H     | 0.0034 |
| SPG21     | 0.0034 |
| NCR2      | 0.0034 |
| CTF1      | 0.0033 |
| PSMC2     | 0.0033 |
| CSK       | 0.0033 |
| TRIM14    | 0.0033 |
| TNFRSF11A | 0.0033 |
| DCBLD2    | 0.0033 |
| MAEA      | 0.0033 |
| PSMB8     | 0.0033 |
| B2L10     | 0.0033 |
| F8A3      | 0.0033 |
| WASL      | 0.0033 |
| ACVR1B    | 0.0033 |
| IL8       | 0.0032 |
| MAPK8     | 0.0032 |
| RNASE7    | 0.0032 |
| CISH      | 0.0032 |
| CBL       | 0.0032 |
| BCL7C     | 0.0032 |
| TSTA3     | 0.0032 |
| ABCE1     | 0.0032 |
| PSMD4     | 0.0031 |
| AGER      | 0.0031 |
| CD68      | 0.0031 |
| ADAR      | 0.0031 |

|         |        |
|---------|--------|
| F3      | 0.0031 |
| TFPI    | 0.0031 |
| FCN1    | 0.0031 |
| SP2     | 0.0031 |
| ACVR1   | 0.0031 |
| ITGAV   | 0.0031 |
| NR3C1   | 0.0031 |
| MAP4K2  | 0.0030 |
| HNMT    | 0.0030 |
| ICAM1   | 0.0030 |
| CHUK    | 0.0030 |
| CD276   | 0.0030 |
| TSN8    | 0.0030 |
| ID1     | 0.0029 |
| LY6G6D  | 0.0029 |
| ZBTB12  | 0.0029 |
| MAD4    | 0.0029 |
| VEGFB   | 0.0028 |
| SIGMAR1 | 0.0028 |
| PROS1   | 0.0028 |
| PVRL1   | 0.0028 |
| TF7L1   | 0.0028 |
| IL1RAP  | 0.0028 |
| CFAH    | 0.0028 |
| CMKLR1  | 0.0028 |
| RAC3    | 0.0028 |
| TLR4    | 0.0028 |
| TMED1   | 0.0028 |
| ALOX5AP | 0.0028 |
| CD2AP   | 0.0028 |
| VPP1    | 0.0027 |
| IRF3    | 0.0027 |
| STK19   | 0.0027 |
| ABCA1   | 0.0027 |
| ATF1    | 0.0027 |
| CF047   | 0.0027 |
| LRP1    | 0.0027 |
| PTN6    | 0.0026 |
| VEGFA   | 0.0026 |
| LGALS8  | 0.0026 |
| DDA1    | 0.0026 |
| PML     | 0.0026 |
| PTK2    | 0.0026 |
| IFIT5   | 0.0026 |
| WIPF1   | 0.0026 |
| FO XK2  | 0.0026 |
| MAP3K3  | 0.0025 |
| ITAX    | 0.0025 |
| MYD88   | 0.0025 |
| DXO     | 0.0025 |



|         |        |
|---------|--------|
| CXCL1LA | 0.0025 |
| ATL2    | 0.0025 |
| IFIT1   | 0.0025 |
| PRKRIR  | 0.0025 |
| TAPBPL  | 0.0025 |
| KIG18   | 0.0025 |
| MMD     | 0.0025 |
| ASC     | 0.0024 |
| SFSWAP  | 0.0024 |
| GTPB1   | 0.0024 |
| RETN    | 0.0024 |
| OASL2   | 0.0024 |
| COLEC12 | 0.0024 |
| GBP1    | 0.0024 |
| F13A1   | 0.0023 |
| ABCF1   | 0.0023 |
| TCF4    | 0.0023 |
| TNFAIP6 | 0.0023 |
| NFIL3   | 0.0023 |
| B2CL2   | 0.0023 |
| TRAF4   | 0.0023 |
| ELK4    | 0.0023 |
| SKIV2L  | 0.0023 |
| TNFSF12 | 0.0023 |
| ORM1    | 0.0023 |
| CASP6   | 0.0023 |
| DOCK1   | 0.0022 |
| NCOA6   | 0.0022 |
| CD34    | 0.0022 |
| MAPK2   | 0.0022 |
| BCL3    | 0.0022 |
| KBRAS1  | 0.0022 |
| NEUR1   | 0.0022 |
| CATH    | 0.0022 |
| ALCAM   | 0.0022 |
| TRAF2   | 0.0022 |
| MLLT6   | 0.0022 |
| MHCII   | 0.0022 |
| MLLT1   | 0.0022 |
| CXCR4   | 0.0022 |
| RIPK1   | 0.0022 |
| DAXX    | 0.0022 |
| RAC2    | 0.0021 |
| C4B     | 0.0021 |
| IL17RC  | 0.0021 |
| PPP1R10 | 0.0021 |
| SIAT1   | 0.0021 |
| PTGER4  | 0.0021 |
| EGR1    | 0.0021 |
| NOTCG4  | 0.0021 |

|          |        |
|----------|--------|
| PSMD5    | 0.0021 |
| MRC2     | 0.0021 |
| I17RA    | 0.0020 |
| EHMT1    | 0.0020 |
| PTN9     | 0.0020 |
| NFIB     | 0.0020 |
| SPA17    | 0.0020 |
| PSMF1    | 0.0020 |
| M4K3     | 0.0020 |
| NFATC3   | 0.0020 |
| ATP6V0A2 | 0.0020 |
| ILF3     | 0.0020 |
| C43BP    | 0.0019 |
| PLAU     | 0.0019 |
| IRAK4    | 0.0019 |
| CLC4G    | 0.0019 |
| VAR5     | 0.0019 |
| IRF1     | 0.0019 |
| PADI1    | 0.0019 |
| AIF1L    | 0.0019 |
| VPP3     | 0.0019 |
| GIMA5    | 0.0019 |
| KANK1    | 0.0019 |
| B3GNT6   | 0.0019 |
| TP4AP    | 0.0019 |
| PTPN1    | 0.0019 |
| LRBA     | 0.0019 |
| MPL      | 0.0019 |
| ALOX5    | 0.0018 |
| TSPAN7   | 0.0018 |
| TNAP2    | 0.0018 |
| PGLYRP2  | 0.0018 |
| SYTL1    | 0.0018 |
| FKBP5    | 0.0018 |
| LPAR1    | 0.0018 |
| CD37     | 0.0018 |
| CCR5     | 0.0018 |
| C1QTNF5  | 0.0018 |
| FADD     | 0.0018 |
| AATK     | 0.0017 |
| CXL14    | 0.0017 |
| TGFB2    | 0.0017 |
| IKBKAP   | 0.0017 |
| BRD3     | 0.0017 |
| TAB2     | 0.0017 |
| BAD      | 0.0017 |
| DDR2     | 0.0017 |
| CFAD     | 0.0017 |
| IGF2R    | 0.0017 |
| PTN13    | 0.0017 |

|               |        |
|---------------|--------|
| LIF           | 0.0017 |
| DIDO1         | 0.0017 |
| CD300A        | 0.0016 |
| GBP6          | 0.0016 |
| ATRN          | 0.0016 |
| SOCS1         | 0.0016 |
| CEBPB         | 0.0016 |
| IRAK2         | 0.0016 |
| HSF1          | 0.0016 |
| ITGA1         | 0.0016 |
| CD82          | 0.0016 |
| PTX3          | 0.0016 |
| OSMR          | 0.0016 |
| TNFRSF6       | 0.0016 |
| TNFRSF1B      | 0.0016 |
| MAD1          | 0.0016 |
| ITGAL         | 0.0015 |
| ABL1          | 0.0015 |
| CXCL10A       | 0.0015 |
| CATHb (CATH3) | 0.0015 |
| C4BPA         | 0.0015 |
| DAP3          | 0.0015 |
| BAK1          | 0.0015 |
| ARRB2         | 0.0015 |
| CXCL13        | 0.0015 |
| BAT4          | 0.0015 |
| CCND1         | 0.0015 |
| KITLG         | 0.0015 |
| PROCR         | 0.0015 |
| CYTH1         | 0.0015 |
| MED1          | 0.0015 |
| TANK          | 0.0015 |
| IGHG          | 0.0014 |
| KIG7          | 0.0014 |
| BCL10         | 0.0014 |
| FGFP2         | 0.0014 |
| CSF1          | 0.0014 |
| KNG1          | 0.0014 |
| GYPC          | 0.0014 |
| C7            | 0.0014 |
| BAG4          | 0.0014 |
| CEACAM1       | 0.0013 |
| PRC2B         | 0.0013 |
| PNCK          | 0.0013 |
| ADK           | 0.0013 |
| BAG1          | 0.0013 |
| SERPINE1      | 0.0013 |
| IL33          | 0.0013 |
| FTH1          | 0.0013 |
| KMT2A         | 0.0013 |

|          |        |
|----------|--------|
| PVRL3    | 0.0013 |
| GCNT2    | 0.0013 |
| TNFRSF21 | 0.0012 |
| NFATC3   | 0.0012 |
| SOCS6    | 0.0012 |
| ARRB1    | 0.0012 |
| C5AR1    | 0.0012 |
| PCGF2    | 0.0012 |
| MAF      | 0.0012 |
| SMARCAD1 | 0.0012 |
| CBLC     | 0.0012 |
| HM13     | 0.0012 |
| MAP4K1   | 0.0012 |
| ITCH     | 0.0012 |
| APLP1    | 0.0012 |
| TREM2    | 0.0012 |
| ENTPD1   | 0.0012 |
| CCLK6    | 0.0012 |
| GNAQ     | 0.0012 |
| TGFB3    | 0.0012 |
| CLC4K    | 0.0011 |
| NOD1     | 0.0011 |
| IFIT5    | 0.0011 |
| PSB9     | 0.0011 |
| EDA2R    | 0.0011 |
| IRF5     | 0.0011 |
| TNFSF13L | 0.0011 |
| TNXB     | 0.0011 |
| IL6RA    | 0.0011 |
| TNC      | 0.0011 |
| GNAQ     | 0.0011 |
| CASP10   | 0.0011 |
| APLN     | 0.0011 |
| ELMO2    | 0.0011 |
| HCK      | 0.0011 |
| PTK2B    | 0.0011 |
| MAP2K7   | 0.0011 |
| MCM3AP   | 0.0011 |
| CD200R   | 0.0011 |
| FCGR3    | 0.0011 |
| IGK      | 0.0011 |
| NCF2     | 0.0011 |
| NFKBIZ   | 0.0011 |
| GSTM5    | 0.0011 |
| TNFRSF14 | 0.0011 |
| IL31R    | 0.0011 |
| CCLK1    | 0.0011 |
| TLR1     | 0.0011 |
| PPARD    | 0.0011 |
| TGIF2    | 0.0011 |

|                 |        |
|-----------------|--------|
| ATM             | 0.0010 |
| PPT2            | 0.0010 |
| VEGFC           | 0.0010 |
| TGFA            | 0.0010 |
| RFXANK          | 0.0010 |
| ABCA7           | 0.0010 |
| MAP3K7          | 0.0010 |
| TNFRSF10C       | 0.0010 |
| FOXN2           | 0.0010 |
| SERPINA3        | 0.0010 |
| IGSF3           | 0.0010 |
| CBP             | 0.0010 |
| NOTCH3          | 0.0010 |
| HSF2            | 0.0010 |
| ELMO1           | 0.0010 |
| FUT1            | 0.0010 |
| IL1R1           | 0.0010 |
| CD109           | 0.0010 |
| WAS             | 0.0010 |
| LCP2            | 0.0010 |
| IGJ             | 0.0010 |
| KIG13           | 0.0010 |
| ATP6V1G2        | 0.0010 |
| PACS2           | 0.0009 |
| CBLB            | 0.0009 |
| NOTCH1          | 0.0009 |
| SLC7A5          | 0.0009 |
| LYAM1           | 0.0009 |
| BC11A           | 0.0009 |
| OASL2           | 0.0009 |
| AA1R            | 0.0009 |
| TNFAIP3         | 0.0009 |
| CX3CR1          | 0.0009 |
| RFXAP           | 0.0009 |
| SPTB1           | 0.0009 |
| OAS3            | 0.0009 |
| RIPK2           | 0.0009 |
| IKBL1           | 0.0009 |
| SIGLEC          | 0.0009 |
| IL3RA or CSF2RA | 0.0009 |
| CCND3           | 0.0009 |
| IL18            | 0.0009 |
| TNFRSF6B        | 0.0009 |
| IL36L1          | 0.0009 |
| MARCH8          | 0.0009 |
| CD5L            | 0.0009 |
| AFF1            | 0.0009 |
| CCND2           | 0.0009 |
| IKBP1           | 0.0008 |
| CCR1            | 0.0008 |

|          |        |
|----------|--------|
| TRAF6    | 0.0008 |
| JAM2     | 0.0008 |
| MAP2K4   | 0.0008 |
| EMR1     | 0.0008 |
| IKZF5    | 0.0008 |
| IL5      | 0.0008 |
| ITGA3    | 0.0008 |
| KPTN     | 0.0008 |
| CSF2RB   | 0.0008 |
| GNE      | 0.0008 |
| NFATC1   | 0.0008 |
| PREX1    | 0.0008 |
| GPR183   | 0.0008 |
| EBF1     | 0.0008 |
| CLEC4F   | 0.0008 |
| TXLNA    | 0.0008 |
| CCL28    | 0.0008 |
| ERBB2    | 0.0008 |
| GPSM3    | 0.0008 |
| CLECSF6  | 0.0008 |
| TNFSF0   | 0.0008 |
| C1R      | 0.0008 |
| ISG15    | 0.0008 |
| BCL7B    | 0.0007 |
| PABP4    | 0.0007 |
| IRF8     | 0.0007 |
| NCF1     | 0.0007 |
| FKBPL    | 0.0007 |
| INPP5D   | 0.0007 |
| MAP3K4   | 0.0007 |
| ATRN     | 0.0007 |
| IL36RN   | 0.0007 |
| CD84     | 0.0007 |
| CBFA2T2H | 0.0007 |
| RFX1     | 0.0007 |
| PAFAH2   | 0.0007 |
| ENTPD5   | 0.0007 |
| CYP2U1   | 0.0007 |
| TNFRSF18 | 0.0007 |
| MAPK13   | 0.0007 |
| C1QT2    | 0.0007 |
| PLA2G4A  | 0.0007 |
| BKRB2    | 0.0007 |
| MLLT10   | 0.0007 |
| NFAT5    | 0.0007 |
| PADI4    | 0.0007 |
| VCAM1    | 0.0007 |
| ICOSL    | 0.0007 |
| CCRL2    | 0.0007 |
| TLR8     | 0.0007 |

|         |        |
|---------|--------|
| TNFSF7  | 0.0006 |
| VAR2    | 0.0006 |
| CREBBP  | 0.0006 |
| CYSLTR1 | 0.0006 |
| BTK     | 0.0006 |
| CP      | 0.0006 |
| TDP2    | 0.0006 |
| GAB2    | 0.0006 |
| TBXAS1  | 0.0006 |
| CASP4   | 0.0006 |
| IRAK1   | 0.0006 |
| SEMA4D  | 0.0006 |
| PPARG   | 0.0006 |
| DST     | 0.0006 |
| CX3CL1  | 0.0006 |
| NKTR    | 0.0006 |
| TXLNG   | 0.0006 |
| DAPK1   | 0.0006 |
| IGHA    | 0.0006 |
| SLAMF9  | 0.0006 |
| LY86    | 0.0006 |
| SCARF1  | 0.0006 |
| C1QT1   | 0.0006 |
| HTR6    | 0.0006 |
| SRC     | 0.0006 |
| IL10RA  | 0.0006 |
| CLEC11A | 0.0006 |
| ZEB1    | 0.0006 |
| SREC2   | 0.0006 |
| CASP2   | 0.0006 |
| CRISP3  | 0.0006 |
| IFIT3   | 0.0006 |
| CSF3R   | 0.0006 |
| BIRC5   | 0.0006 |
| PVRL2   | 0.0006 |
| TLR5    | 0.0006 |
| BCL2    | 0.0006 |
| IGHM    | 0.0005 |
| MAPK5   | 0.0005 |
| CLEC1A  | 0.0005 |
| GEM     | 0.0005 |
| MHCI    | 0.0005 |
| PRKR    | 0.0005 |
| IFNGR2  | 0.0005 |
| LGALS3  | 0.0005 |
| SN      | 0.0005 |
| RN216   | 0.0005 |
| PDL2    | 0.0005 |
| DGKD    | 0.0005 |
| SPP1    | 0.0005 |

|         |        |
|---------|--------|
| CCL24   | 0.0005 |
| TLR1    | 0.0005 |
| CHST4   | 0.0005 |
| INDO1   | 0.0005 |
| HAS2    | 0.0005 |
| CXCL5L  | 0.0005 |
| MAP3K2  | 0.0005 |
| ICAM2   | 0.0005 |
| DARC    | 0.0005 |
| HMHA1   | 0.0005 |
| HBEGF   | 0.0005 |
| LRC1    | 0.0005 |
| C8AP2   | 0.0005 |
| IL17B   | 0.0005 |
| PDE7A   | 0.0005 |
| CYP2C19 | 0.0005 |
| IRAK3   | 0.0005 |
| CREM    | 0.0005 |
| DEFB19  | 0.0004 |
| DPP8    | 0.0004 |
| FKBP1B  | 0.0004 |
| PDCD7   | 0.0004 |
| CLEC4E  | 0.0004 |
| MAP3K14 | 0.0004 |
| PSMB10  | 0.0004 |
| C1QTNF6 | 0.0004 |
| MOG     | 0.0004 |
| TCAM1   | 0.0004 |
| TLR7    | 0.0004 |
| PTGIR   | 0.0004 |
| PTPRC   | 0.0004 |
| MMP9    | 0.0004 |
| DEF6    | 0.0004 |
| EDA     | 0.0004 |
| VS10L   | 0.0004 |
| PLXA1   | 0.0004 |
| ITA7    | 0.0004 |
| TNFRSF5 | 0.0004 |
| TRIM32  | 0.0004 |
| VIPR1   | 0.0004 |
| CD226   | 0.0004 |
| LYZ     | 0.0004 |
| CP2K1   | 0.0004 |
| MUC13   | 0.0004 |
| IGL     | 0.0004 |
| CCR6    | 0.0003 |
| TAL1    | 0.0003 |
| MHC2TA  | 0.0003 |
| KCC1A   | 0.0003 |
| IL17D   | 0.0003 |



|           |        |
|-----------|--------|
| IL21R     | 0.0003 |
| FLT3      | 0.0003 |
| SEM3G     | 0.0003 |
| MVK       | 0.0003 |
| IL7RA     | 0.0003 |
| IL16      | 0.0003 |
| IRF4      | 0.0003 |
| PIGA      | 0.0003 |
| MLLT3     | 0.0003 |
| BKRB1     | 0.0003 |
| FAIM3     | 0.0003 |
| AFF3      | 0.0003 |
| VAV1      | 0.0003 |
| FCRLA     | 0.0003 |
| DOCK2     | 0.0003 |
| IL17RE    | 0.0003 |
| ICOS      | 0.0003 |
| AIM2      | 0.0003 |
| PGRP1     | 0.0003 |
| TNFRSF10B | 0.0003 |
| DAF       | 0.0003 |
| KIG3      | 0.0003 |
| VAV3      | 0.0003 |
| IGHL      | 0.0003 |
| PTGS1     | 0.0003 |
| CP1A1     | 0.0003 |
| IGK       | 0.0003 |
| PTAFR     | 0.0003 |
| CLEC5A    | 0.0003 |
| MOG       | 0.0003 |
| CSF2RA    | 0.0003 |
| BC11A     | 0.0003 |
| ABCG4     | 0.0003 |
| NRP2      | 0.0003 |
| IKZF2     | 0.0003 |
| ATL1      | 0.0003 |
| TNFRSF19  | 0.0003 |
| IKBKE     | 0.0003 |
| MHCI      | 0.0003 |
| IKZF4     | 0.0003 |
| AVPR1A    | 0.0003 |
| MAP3K8    | 0.0003 |
| RELB      | 0.0002 |
| KIG10     | 0.0002 |
| ADAM9     | 0.0002 |
| TICAM2    | 0.0002 |
| LT4R2     | 0.0002 |
| TNFSF8    | 0.0002 |
| NFATC2    | 0.0002 |
| IGHV      | 0.0002 |

|          |        |
|----------|--------|
| TRAF3    | 0.0002 |
| PDCD1LG1 | 0.0002 |
| TRAC     | 0.0002 |
| TNFSF13B | 0.0002 |
| SLC11A1  | 0.0002 |
| BLNK     | 0.0002 |
